# Supplementary material
Source: PubMed Central journal article supplement (PMC9704435)
Supplement: jiac419_supplementary_data.pdf [file jiac419_supplementary_data.pdf]

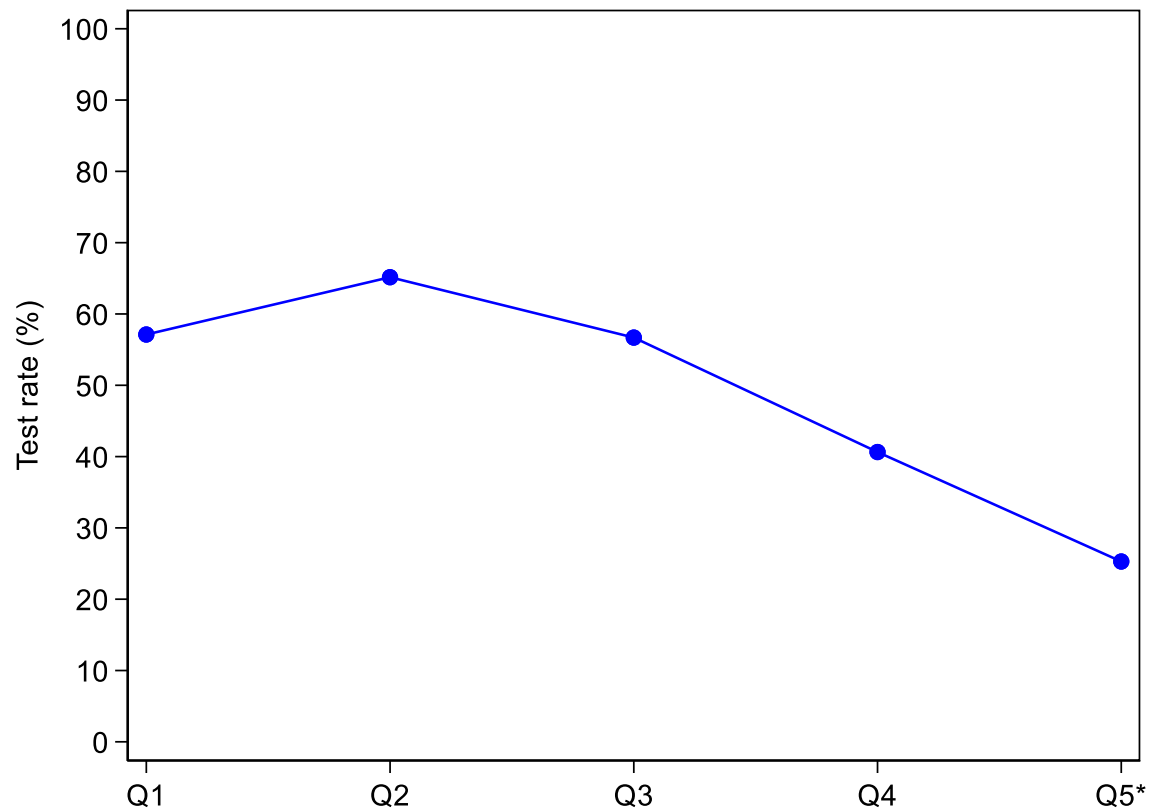

**Supplementary figure 1:** Test frequency among the 85 801 participants in the study sample. Test frequency was calculated for each questionnaire (Q1–Q5) and defined as number of participants reporting on the questionnaire that they had been tested for SARS-CoV-2 during the last 14 days divided by the number of participants who responded to the questionnaire. \* Test frequency for Q5 was based on MoBa-participants only, since Q5 was not distributed to participants from the Senior cohort.

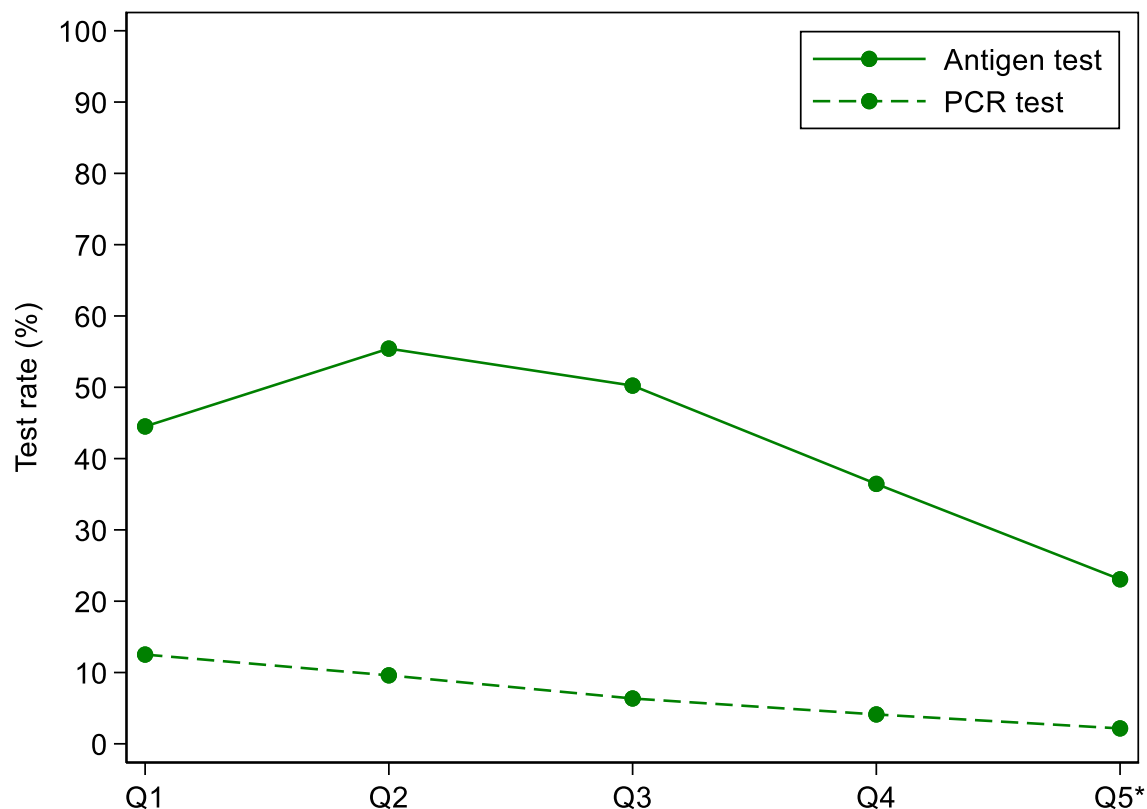

**Supplementary figure 2:** Test frequency with antigen test or with PCR test among the 85 801 participants in the study sample. Test frequency with antigen test includes participants who during the last 14 days had been tested with antigen test only. Test frequency with PCR test includes participants who during the last 14 days had been tested with PCR test only or both PCR test and antigen test. Most participants with a PCR test during the last 14 days had also been tested with an antigen test during the last 14 days (> 80% on all questionnaires). \* Test frequencies for Q5 was based on MoBa-participants only, since Q5 was not distributed to participants from the Senior cohort.

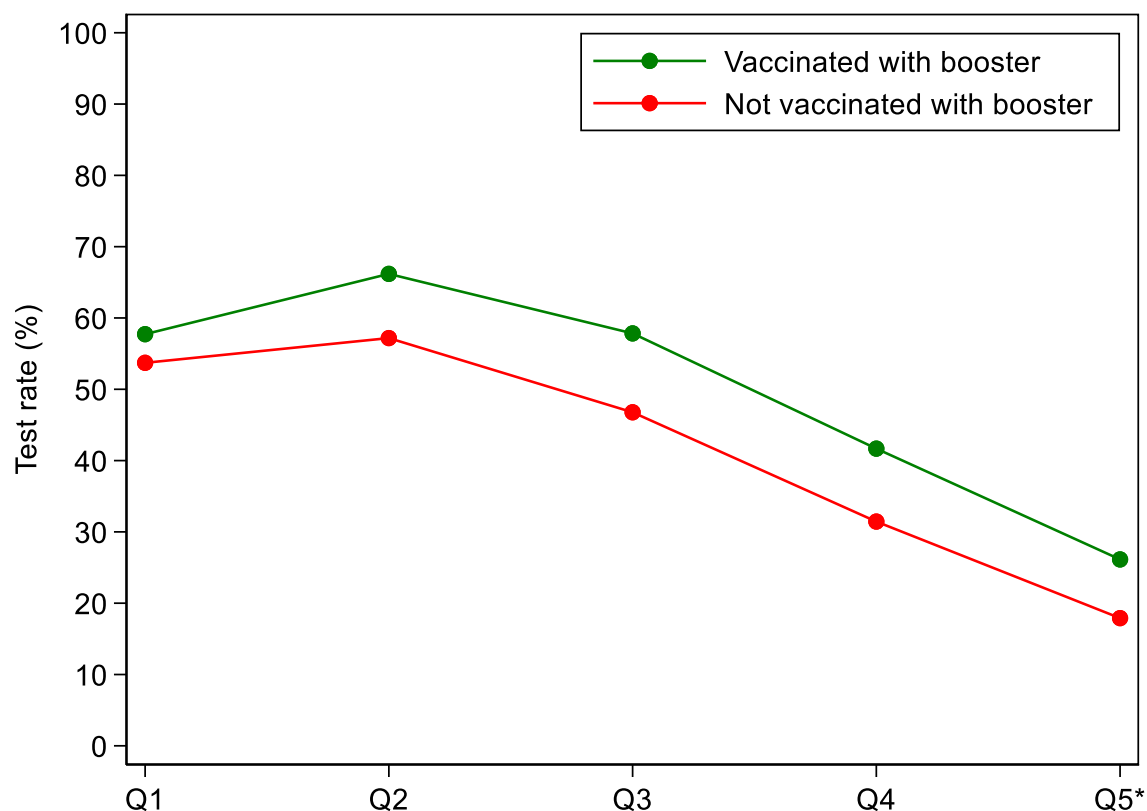

**Supplementary figure 3:** Test frequency among the 85 801 participants in the study sample by vaccination status. Test frequency was calculated for each questionnaire (Q1–Q5) and defined as number of participants reporting on the questionnaire that they had been tested for SARS-CoV-2 during the last 14 days divided by the number of participants who responded to the questionnaire. Vaccination status was assessed at fill-in date of each questionnaire. \* Test frequency for Q5 was based on MoBa-participants only, since Q5 was not distributed to participants from the Senior cohort.

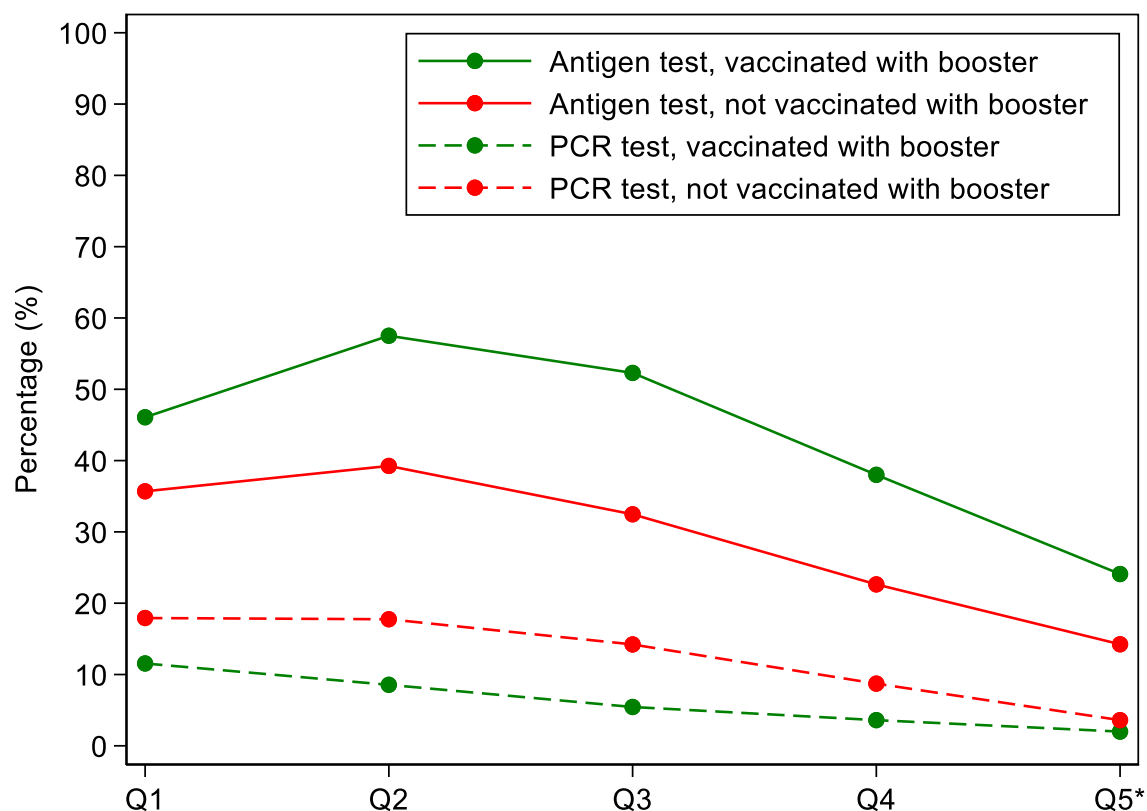

**Supplementary figure 4:** Test frequency with antigen test or with PCR test among the 85 801 participants in the study sample by vaccination status. Test frequency with antigen test includes participants who during the last 14 days had been tested with antigen test only. Test frequency with PCR test includes participants who during the last 14 days had been tested with PCR test only or both PCR test and antigen test. Most participants with a PCR test during the last 14 days had also been tested with an antigen test during the last 14 days (> 80% on all questionnaires). Vaccination status was assessed at fill-in date of each questionnaire. \* Test frequency for Q5 was based on MoBa-participants only, since Q5 was not distributed to participants from the Senior cohort.

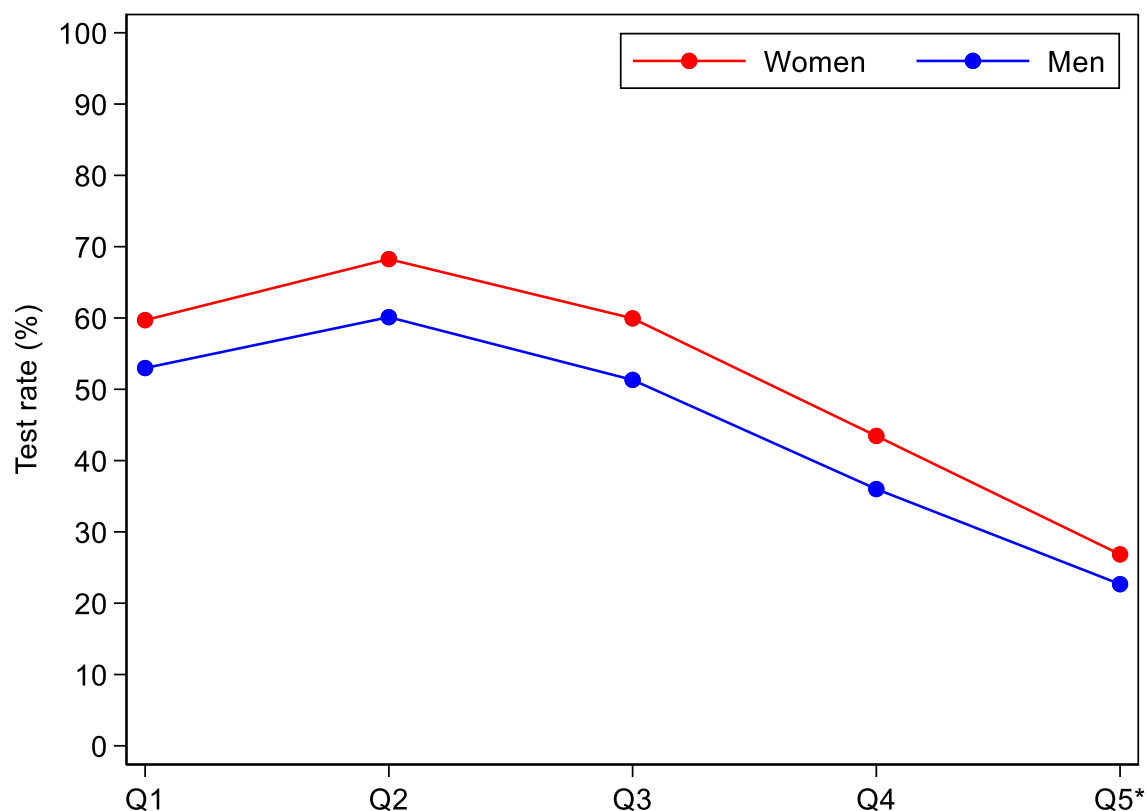

**Supplementary figure 5:** Test frequency among the 85 801 participants in the study sample by sex. Test frequency was calculated for each questionnaire (Q1–Q5) and defined as number of participants reporting that they had been tested for SARS-CoV-2 during the last 14 days divided by the number of participants who responded to the questionnaire. \* Test frequency for Q5 was based on MoBa-participants only, since Q5 was not distributed to participants from the Senior cohort.

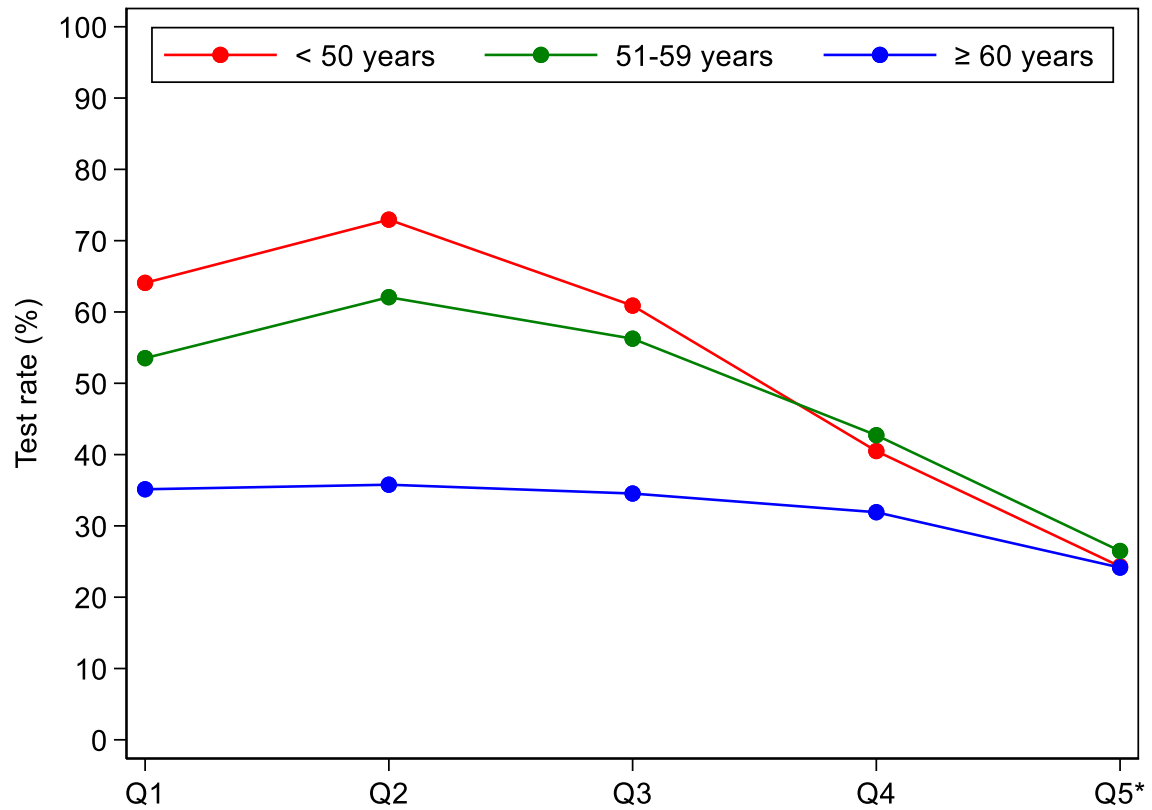

**Supplementary figure 6:** Test frequency among the 85 801 participants in the study sample by age. Test frequency was calculated for each questionnaire (Q1–Q5) and defined as number of participants reporting that they had been tested for SARS-CoV-2 during the last 14 days divided by the number of participants who responded to the questionnaire. \* Test frequency for Q5 was based on MoBa-participants only, since Q5 was not distributed to participants from the Senior cohort.

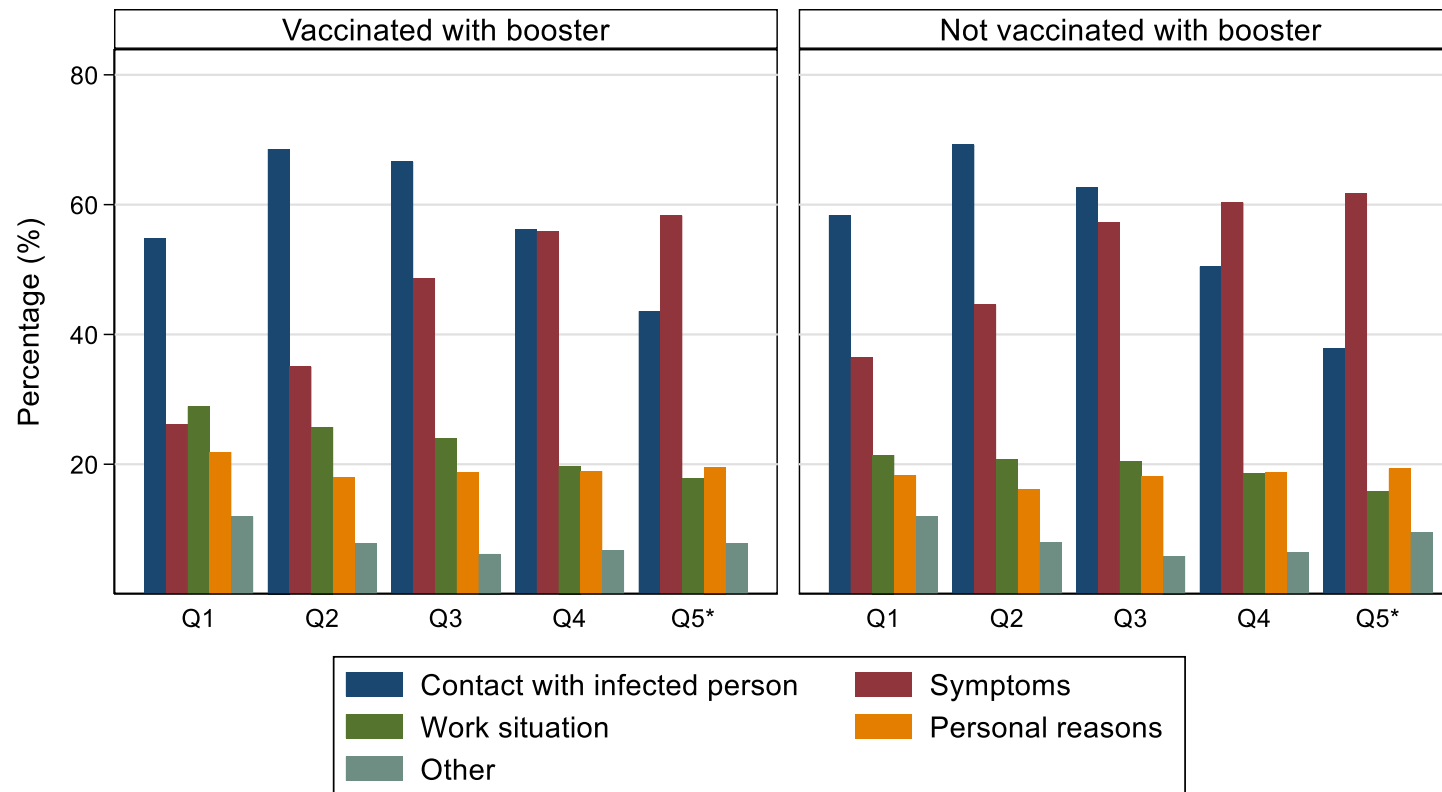

**Supplementary figure 7:** Most common reasons for getting a SARS-CoV-2 test by vaccination status. On each questionnaire Q1–Q5, the denominator was the number of participants reporting on the questionnaire that they had been tested for SARS-CoV-2 during the last 14 days. Vaccination status was assessed at fill-in date of each questionnaire. The Other-category includes “been abroad”, “health conditions”, “recommended by health care worker”, “participation in research project”, “contact tracing”, and “other reasons”. Participants could select multiple answers. \* Percentages for Q5 was based on MoBa-participants only, since Q5 was not distributed to participants from the Senior cohort.

**Supplementary table 1: Effectiveness of booster vaccination with mRNA vaccine against SARS-CoV-2 infection and COVID-19 caused by the Omicron variant among participants in the Norwegian Mother, Father and Child Cohort Study and the Senior Cohort with no previous infection, N = 81 873**

|                                        | SARS-CoV-2 infection |                          |                              | Mild COVID-19 |                              | Moderate COVID-19 |                              | Severe COVID-19 |                                |
|----------------------------------------|----------------------|--------------------------|------------------------------|---------------|------------------------------|-------------------|------------------------------|-----------------|--------------------------------|
| Interval<br>(days from<br>vaccination) | Person time,<br>days | Cases,<br>n <sup>1</sup> | rVE <sup>2</sup><br>(95% CI) | Cases,<br>n   | rVE <sup>2</sup><br>(95% CI) | Cases,<br>n       | rVE <sup>2</sup><br>(95% CI) | Cases,<br>n     | rVE <sup>2</sup><br>(95% CI)   |
| Two doses <sup>3</sup>                 |                      |                          |                              |               |                              |                   |                              |                 |                                |
| > 130                                  | 271 134              | 4566                     | Ref                          | 1426          | Ref                          | 2722              | Ref                          | 303             | Ref                            |
| Booster vaccination <sup>4</sup>       |                      |                          |                              |               |                              |                   |                              |                 |                                |
| 0 – 6                                  | 113 508              | 858                      | 33.6 (28.4, 38.3)            | 408           | 3.0 (-8.5, 13.3)             | 394               | 46.3 (40.2, 51.8)            | 28              | 61.8 (43.4, 74.3)              |
| 7 – 30                                 | 857 521              | 8487                     | 42.2 (40.1, 44.3)            | 4166          | 9.4 (3.7, 14.8)              | 3812              | 56.5 (54.2, 58.6)            | 179             | 81.0 (77.0, 84.3)              |
| 31 – 60                                | 1 157 250            | 16 294                   | 37.9 (35.7, 40.0)            | 7489          | 9.3 (3.8, 14.5)              | 7900              | 49.7 (47.3, 51.9)            | 408             | 76.5 (72.5, 79.9)              |
| 61 – 90                                | 668 281              | 8842                     | 33.8 (31.2, 36.3)            | 3857          | 10.0 (3.9, 15.7)             | 4498              | 43.2 (40.1, 46.0)            | 263             | 69.5 (63.4, 74.5)              |
| 91 – 120                               | 167 924              | 1811                     | 26.7 (22.2, 31.0)            | 850           | -2.3 (-12.3, 6.9)            | 858               | 39.0 (33.7, 43.9)            | 61              | 63.2 (50.3, 72.8) <sup>5</sup> |
| > 120                                  | 13 236               | 165                      | 15.2 (0.7, 27.5)             | 80            | -20.3 (-51.4, 4.3)           | 77                | 29.2 (11.0, 43.6)            | — <sup>5</sup>  | — <sup>5</sup>                 |

<sup>1</sup> Includes asymptomatic SARS-CoV-2 infections and SARS-CoV-2 infection not possible to classify according to severity. Thus, the number of cases exceeds the sum of mild, moderate, and severe COVID-19 cases.

<sup>2</sup> rVE = 100% · (1 – HR). HR was estimated using a stratified Cox model with county as strata and calendar time as the underlying time scale. The model was adjusted for previous SARS-CoV-2 infection, age, and sex.

<sup>3</sup> The reference category consisted of person time more than 130 days after the second vaccine dose up until booster vaccination.

<sup>4</sup> Booster vaccination was defined as a third vaccine dose received at least 130 days after the second dose.

<sup>5</sup> For severe COVID-19, the upper category was receipt of booster vaccination more than 90 days previously.

**Supplementary table 2: Effectiveness of booster vaccination with mRNA vaccine against SARS-CoV-2 and COVID-19 caused by the Omicron variant among participants in The Norwegian Mother, Father and Child Cohort Study and the Senior Cohort, by booster vaccine**

|                                             |                   | SARS-CoV-2 infection  |                           | Mild COVID-19 |                           | Moderate or severe COVID-19 |                           |
|---------------------------------------------|-------------------|-----------------------|---------------------------|---------------|---------------------------|-----------------------------|---------------------------|
| Interval (days from vaccination)            | Person time, days | Cases, n <sup>1</sup> | rVE <sup>2</sup> (95% CI) | Cases, n      | rVE <sup>2</sup> (95% CI) | Cases, n                    | rVE <sup>2</sup> (95% CI) |
| Two doses <sup>3</sup>                      |                   |                       |                           |               |                           |                             |                           |
| > 130                                       | 419 536           | 4895                  | Ref                       | 1607          | Ref                       | 3165                        | Ref                       |
| Booster vaccination, Comirnaty <sup>4</sup> |                   |                       |                           |               |                           |                             |                           |
| 0 – 6                                       | 65 239            | 482                   | 33.9 (27.3, 39.9)         | 227           | 5.2 (-8.7, 17.3)          | 239                         | 48.5 (41.2, 54.9)         |
| 7 – 30                                      | 479 943           | 4645                  | 42.6 (40.2, 44.9)         | 2231          | 10.8 (4.8, 16.4)          | 2234                        | 58.6 (56.3, 60.9)         |
| 31 – 60                                     | 720 558           | 9816                  | 36.5 (34.1, 38.7)         | 4497          | 7.1 (1.4, 12.4)           | 5015                        | 51.5 (49.1, 53.7)         |
| 61 – 90                                     | 456 748           | 6380                  | 32.4 (29.6, 35.1)         | 2749          | 8.1 (1.9, 13.9)           | 3466                        | 44.9 (41.9, 47.6)         |
| > 90                                        | 149 752           | 1656                  | 25.0 (20.3, 29.5)         | 767           | -3.4 (-13.5, 5.9)         | 847                         | 39.9 (34.8, 44.7)         |
| Booster vaccination, Spikevax <sup>4</sup>  |                   |                       |                           |               |                           |                             |                           |
| 0 – 6                                       | 50 046            | 382                   | 30.2 (22.4, 37.2)         | 185           | 0.6 (-15.6, 14.5)         | 185                         | 45.4 (36.6, 53.1)         |
| 7 – 30                                      | 384 624           | 3861                  | 39.7 (37.0, 42.3)         | 1946          | 3.2 (-3.6, 9.5)           | 1764                        | 58.2 (55.6, 60.6)         |
| 31 – 60                                     | 447 618           | 6508                  | 38.1 (35.6, 40.5)         | 3009          | 9.2 (3.2, 14.7)           | 3305                        | 52.7 (50.2, 55.1)         |
| 61 – 90                                     | 220 316           | 2497                  | 34.4 (30.8, 37.8)         | 1126          | 9.9 (2.2, 17.0)           | 1310                        | 46.6 (42.7, 50.2)         |
| > 90                                        | 35 557            | 39                    | 23.3 (14.0, 31.6)         | 175           | -11.7 (-31.3, 4.9)        | 157                         | 41.8 (31.4, 50.7)         |

<sup>1</sup> Includes asymptomatic SARS-CoV-2 infections and SARS-CoV-2 infection not possible to classify according to severity. Thus, the number of cases exceeds the sum of mild, moderate, and severe COVID-19 cases.

<sup>2</sup> rVE = 100% · (1 – HR). HR was estimated using a stratified Cox model with county as strata and calendar time as the underlying time scale. The model was adjusted for prior SARS-CoV-2 infection, age and sex.

<sup>3</sup> The reference category consisted of person time more than 130 days after the second vaccine dose up until booster vaccination.

<sup>4</sup> Booster vaccination was defined as a third vaccine dose received at least 130 days after the second dose.

**Supplementary Table 3: Effectiveness of booster vaccination with mRNA vaccine against SARS-CoV-2 infection and COVID-19 caused by the Omicron variant among participants in The Norwegian Mother, Father and Child Cohort Study and the Senior Cohort who returned all questionnaires, N = 48 379**

|                                        | SARS-CoV-2 infection |                          |                              | Mild COVID-19 |                              | Moderate COVID-19 |                              | Severe COVID-19 |                                |
|----------------------------------------|----------------------|--------------------------|------------------------------|---------------|------------------------------|-------------------|------------------------------|-----------------|--------------------------------|
| Interval<br>(days from<br>vaccination) | Person time,<br>days | Cases,<br>n <sup>1</sup> | rVE <sup>2</sup><br>(95% CI) | Cases,<br>n   | rVE <sup>2</sup><br>(95% CI) | Cases,<br>n       | rVE <sup>2</sup><br>(95% CI) | Cases,<br>n     | rVE <sup>2</sup><br>(95% CI)   |
| Two doses <sup>3</sup>                 |                      |                          |                              |               |                              |                   |                              |                 |                                |
| > 130                                  | 266 398              | 2450                     | Ref                          | 839           | Ref                          | 1411              | Ref                          | 137             | Ref                            |
| Booster vaccination <sup>4</sup>       |                      |                          |                              |               |                              |                   |                              |                 |                                |
| 0 – 6                                  | 78 425               | 436                      | 34.4 (27.2, 40.9)            | 210           | 6.9 (-8.8, 20.3)             | 199               | 46.5 (37.8, 54.1)            | 12              | 62.4 (31.4, 79.4)              |
| 7 – 30                                 | 590 528              | 4726                     | 39.2 (36.0, 42.2)            | 2394          | 4.2 (-4.2, 11.9)             | 2041              | 55.9 (52.6, 58.9)            | 98              | 78.6 (72.0, 83.6)              |
| 31 – 60                                | 814 515              | 9790                     | 33.8 (30.6, 36.8)            | 4598          | 3.8 (-4.2, 11.2)             | 4667              | 47.2 (43.8, 50.5)            | 220             | 76.0 (69.9, 80.8)              |
| 61 – 90                                | 485 054              | 5511                     | 29.3 (25.5, 32.9)            | 2462          | 5.5 (-3.1, 13.5)             | 2764              | 39.6 (35.2, 43.8)            | 143             | 68.5 (59.3, 75.6)              |
| 91 – 120                               | 128 413              | 1187                     | 22.6 (16.3, 28.4)            | 576           | -4.6 (-18.1, 7.3)            | 548               | 35.3 (27.9, 42.0)            | 35              | 60.5 (40.2, 73.9) <sup>5</sup> |
| > 120                                  | 10 390               | 110                      | 9.5 (-9.9, 25.5)             | 54            | -21.9 (-61.6, 8.1)           | 53                | 19.5 (-6.3, 39.0)            | — <sup>5</sup>  | — <sup>5</sup>                 |

<sup>1</sup> Includes asymptomatic SARS-CoV-2 infections and SARS-CoV-2 infection not possible to classify according to severity. Thus, the number of cases exceeds the sum of mild, moderate, and severe COVID-19 cases.

<sup>2</sup> rVE = 100% · (1 – HR). HR was estimated using a stratified Cox model with county as strata and calendar time as the underlying time scale. The model was adjusted for previous SARS-CoV-2 infection, age, and sex.

<sup>3</sup> The reference category consisted of person time more than 130 days after the second vaccine dose up until booster vaccination.

<sup>4</sup> Booster vaccination was defined as a third vaccine dose received at least 130 days after the second dose.

<sup>5</sup> For severe COVID-19, the upper category was receipt of booster vaccination more than 90 days previously.
